# Supplementary material for: Neuroprotective Effects of Licochalcone D in Oxidative-Stress-Induced Primitive Neural Stem Cells from Parkinson’s Disease Patient-Derived iPSCs
Source: MDPI journal article supplement (doi:10.3390/biomedicines11010228), 2023-01-16
Supplement: s1 [file s1]

**Table S1 List of the antibodies used for ICC and Western blotting.****Immunofluorescence**

| <b>Antibody</b>  | <b>Supplier</b>                      | <b>Product No.</b> | <b>Dilution</b> |
|------------------|--------------------------------------|--------------------|-----------------|
| OCT4             | Santa Cruz                           | sc-9081            | 1:500           |
| NANOG            | R&D Systems                          | AF1997             | 1:40            |
| PAX6             | BioLegend                            | 901301             | 1:500           |
| SOX2             | Millipore                            | MAB4343            | 1:200           |
| NESTIN           | Millipore                            | MAB5326            | 1:200           |
| Cleaved Caspase3 | Cell Signaling<br>Technology (C.S.T) | 9661               | 1:400           |

**Western blot**

| <b>Antibody</b>       | <b>Supplier</b> | <b>Product No.</b> | <b>Dilution</b> |
|-----------------------|-----------------|--------------------|-----------------|
| p-EGFR                | C.S.T           | 3777S              | 1:1000          |
| EGFR                  | Santa Cruz      | sc-71033           | 1:1000          |
| p-SAPK/JNK            | C.S.T           | 9251S              | 1:1000          |
| JUND                  | Santa Cruz      | sc-271938          | 1:1000          |
| p-AKT                 | C.S.T           | 4060               | 1:1000          |
| AKT                   | C.S.T           | 9272               | 1:1000          |
| p-c-Jun               | C.S.T           | 3270               | 1:1000          |
| Cleaved Caspase3      | C.S.T           | 9661               | 1:1000          |
| Cleaved PARP (Asp214) | C.S.T           | 9541               | 1:1000          |
| PARP                  | Sigma-Aldrich   | p7605              | 1:1000          |
| Bax                   | C.S.T           | 41162              | 1:1000          |
| GAPDH                 | Santa Cruz      | sc-47724           | 1:3000          |
